# Supplementary material for: IP3 receptors regulate vascular smooth muscle contractility and hypertension
Source: JCI journal article supplement (doi:10.1172/jci.insight.89402), 2016-10-19
Supplement: sd1 [file 1]

| Gene name     | Forward primer (5' → 3') | Reverse primer (3' → 5') |
|---------------|--------------------------|--------------------------|
| <i>Itpr1</i>  | CTCTGTATGCGGAGGGATCTAC   | GCGGAGTATCGATTCATAGGAC   |
| <i>Itpr2</i>  | CTTCCTCTACATTGGGGACATC   | GGCAGAGTATCGATTCATAGGG   |
| <i>Itpr3</i>  | AGCCAAGCAGACTAAACAGGAC   | GCCGCTTGTTTCACAGTTAAGTA  |
| <i>Ryr2</i>   | GCAAGCCAGACTGCATGACC     | AAATCGCAATGCCCAGCTTC     |
| <i>Ryr3</i>   | ATGACGATGAGCCGGATATGAAG  | ACGCCCACGTACATGTGGAA     |
| <i>Cav1.2</i> | CCAAGAACCAGCACCAG        | CCCACAACAATCAAGGC        |
| <i>Stim1</i>  | GGCCAGAGTCTCAGCCATAG     | TCCACATCCACATCACCATT     |
| <i>Stim2</i>  | TCCCTGCATGTCACTGAGTC     | GGGAAGTGTCGTTTCCTTTGA    |
| <i>Plcb1</i>  | CCAAGCGAAACCAGGACAAC     | ACGCTCTGGATCAGATCTTCTGT  |
| <i>Adra1a</i> | AGGCTGCTCAAGTTTTCTCG     | CAGATTGGTCCTTTGGCACT     |
| <i>Adra1b</i> | GGGAGAGTTGAAAGATGCCA     | TTGGTACTGCTGAGGGTGTC     |
| <i>Adra1d</i> | CGCTGTGGTGGAACCGGCAG     | ACAGCTGCACTCAGTAGCAGGTCA |
| <i>Tbxa2r</i> | CCTTGTTCTCACCAGCTTCC     | GCTGAACCATCATCTCCACC     |
| <i>Htr2a</i>  | CCGCTTCAACTCCAGAACCAGC   | CTTCGAATCATCCTGTACCCGAA  |
| <i>Ednra</i>  | CTCCATCTGGATTCTTTTCCTT   | CTTGGTAAAACTCCATGAACT    |
| <i>Agtr1a</i> | GCATCATCTTTGTGGTGGG      | ATCAGCACATCCAGGAATG      |
| <i>Agtr2</i>  | GATGGAGGGAGCTCGGAACT     | TTGAACTGCAGCAACTCCAAATT  |
| <i>Gapdh</i>  | TGGCCTTCCGTGTTCTTAC      | GAGTTGCTGTTGAAGTCGCA     |

**Supplementary table 1: Primers utilized for qRT-PCR analyses.**

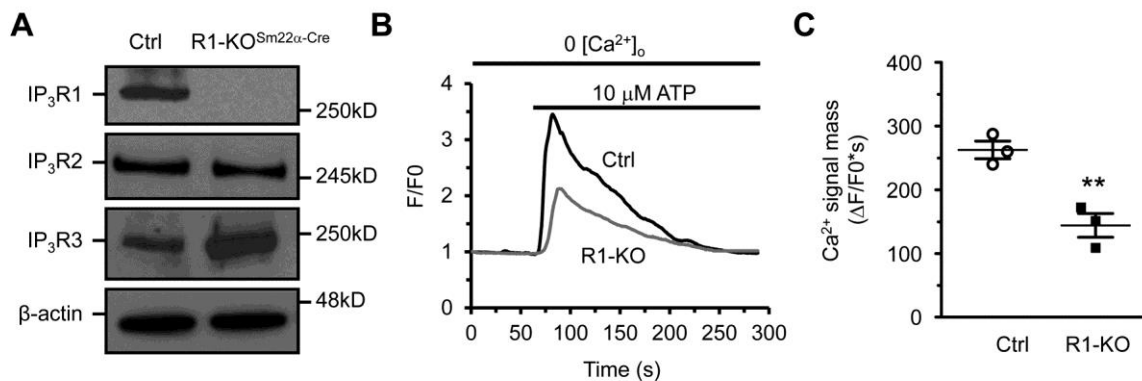

**Supplementary Figure 1. Deletion of IP<sub>3</sub>R1 in VSMCs was not sufficient to abolish intracellular Ca<sup>2+</sup> release induced by ATP.** (A) Expression of IP<sub>3</sub>Rs in aortas isolated from control (Ctrl) and IP<sub>3</sub>R1<sup>f/f</sup>/Sm22α-Cre<sup>+</sup> mice. IP<sub>3</sub>R3 was increased when IP<sub>3</sub>R1 was deleted in aortas. (B) Representative curves of Ca<sup>2+</sup> release induced by 10 μM ATP in cultured control (black) and IP<sub>3</sub>R1-KO (grey) VSMCs. The cells were incubated in Ca<sup>2+</sup>-free solution for 1-2 min to avoid Ca<sup>2+</sup> entry via membrane ionotropic purinergic receptors prior to the administration of ATP. (C) Averaged Ca<sup>2+</sup> signal mass calculated from the time course of Ca<sup>2+</sup> release induced by ATP in VSMCs. n=3 independent experiments per group. Significance was determined by 2-tailed, unpaired Student's *t* test. Data represent mean ± SEM (error bars). \*\*P < 0.01 versus control.

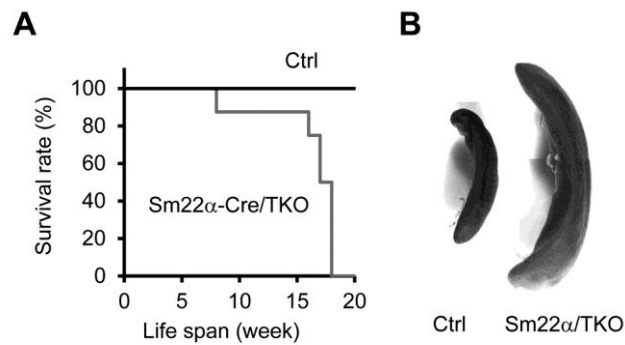

**Supplementary Figure 2. Deletion of all three IP<sub>3</sub>R subtypes by Sm22 $\alpha$ -Cre resulted in premature lethality after birth.** (A) Kaplan-Meier survival curves of control (Ctrl) and IP<sub>3</sub>R1<sup>f/f</sup>IP<sub>3</sub>R2<sup>f/f</sup>IP<sub>3</sub>R3<sup>f/f</sup>/Sm22 $\alpha$ -Cre<sup>+</sup> (Sm22 $\alpha$ -Cre/TKO) mice. n=8 mice per group. (B) Spleens isolated from control and Sm22 $\alpha$ -Cre/TKO mice showing that the spleen from Sm22 $\alpha$ -Cre/TKO mice was enlarged.

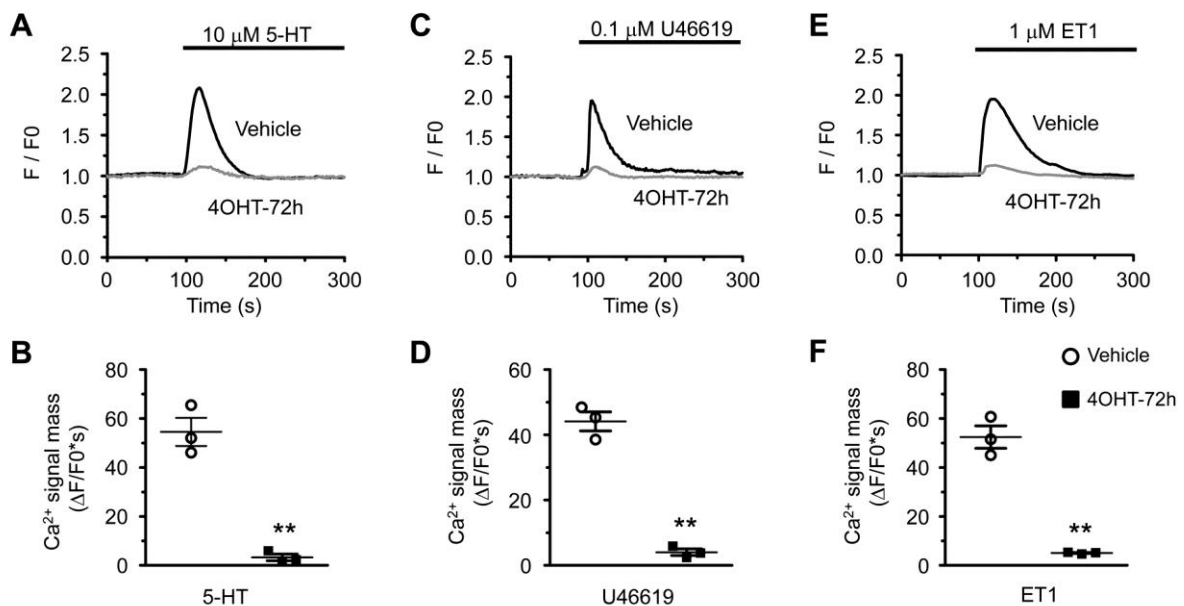

**Supplementary Figure 3. Ca<sup>2+</sup> responses induced by vasoconstrictors that don't activate ionotropic receptor in control and IP<sub>3</sub>R-deleted VSMCs.** Cells were incubated with 5  $\mu$ M fluo-4-AM at 37  $^{\circ}$ C for 30 min, and imaged in regular physiological saline solution containing 1.8mM [Ca<sup>2+</sup>]. (A, C, E) Representative curves of Ca<sup>2+</sup> release induced by 10  $\mu$ M 5-HT (A), 0.1  $\mu$ M U46619 (C), and 1  $\mu$ M ET1 (E) in cultured VSMCs treated with vehicle (black) or 4OHT (grey) for 72 hours. (B, D, F) Averaged Ca<sup>2+</sup> signal mass was calculated from the time course of Ca<sup>2+</sup> release stimulated by 5-HT (B), U46619 (D), and ET1 (F), respectively. n=3 independent experiments per group. Significance was determined by 2-tailed, unpaired Student's *t* test. Data represent mean  $\pm$  SEM (error bars). \*\*P < 0.01 versus control.

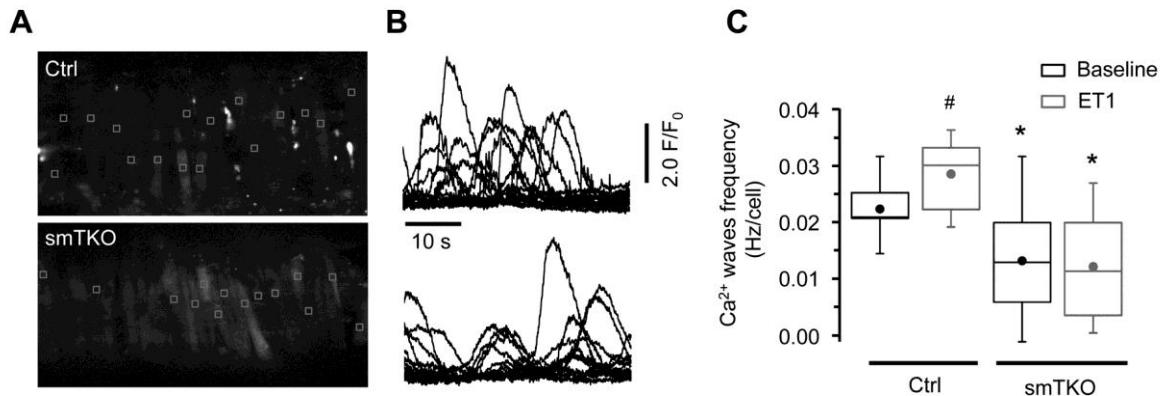

**Supplementary Figure 4. Deletion of IP<sub>3</sub>Rs affects spontaneous Ca<sup>2+</sup> waves in intact VSMCs.** (A) Ca<sup>2+</sup> signals recorded in control (Ctrl) and smTKO smooth muscle cells of intact posterior cerebral artery at baseline. The boxes (12 × 12 pixels) indicate locations of changes in fluorescence ratio (F/F<sub>0</sub>) measured over 40 s in arterial smooth muscle cells. (B) Changes in F/F<sub>0</sub> for respective boxes over 40 s in control (top) and smTKO (bottom) cerebral artery smooth muscle cells. (C) Statistical data illustrating decreased frequency of baseline and Endothelin-1 (ET1, 20 nM)-induced Ca<sup>2+</sup> waves in smTKO smooth muscle cells of cerebral artery segments. n=13, 6, 28, and 16 artery segments from left to right columns, respectively. \**P* < 0.05 versus control. #*P* < 0.05 versus baseline. Significance was determined by 2-way ANOVA analysis with Bonferroni post-hoc test. Data represent mean ± SEM (error bars).

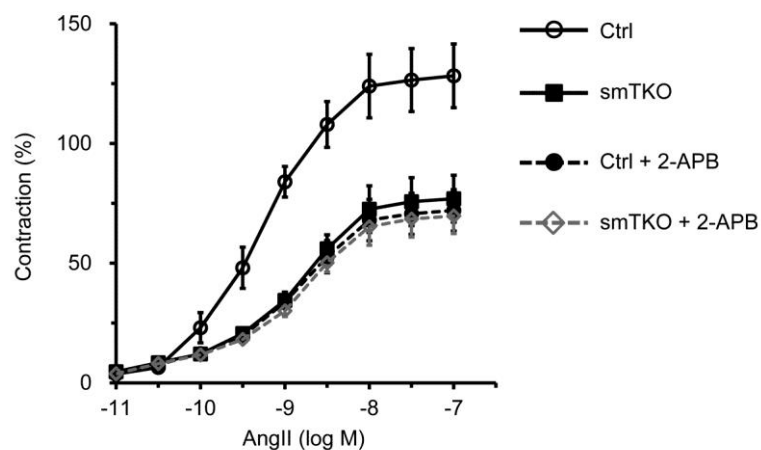

**Supplementary Figure 5. The effects of 2-APB on AngII-induced contraction in control and smTKO vessels.** Myographic measurements were performed on rings of first order of superior mesenteric artery. After the reference contraction was elicited by KCl, the vessels were treated with IP<sub>3</sub>R antagonist 2-APB (50 μM) for 30 min prior to the application of AngII. Data was expressed as percentage of the peak of K<sup>+</sup>-induced contraction. No significant difference was detected between 2-APB-pretreated control (Ctrl+2-APB) and smTKO

(smTKO+2-APB) vessels. n=6 for each group. Significance was determined by 2-way ANOVA analysis with Bonferroni post-hoc test. Data sets represent mean  $\pm$  SEM (error bars).

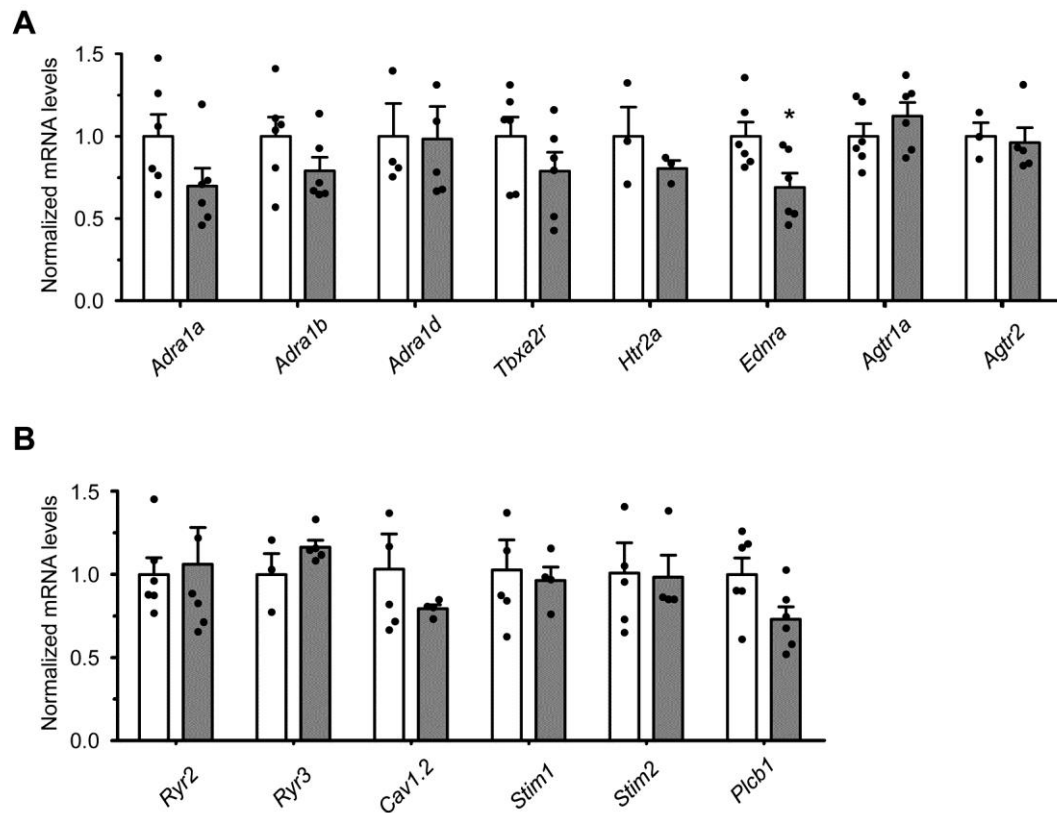

**Supplementary Figure 6. Expression of  $\text{Ca}^{2+}$  channels and GPCRs in control and smTKO vessels.** mRNA was isolated from control (Ctrl) and smTKO aortas and gene expression was determined by RT-PCR technique. (A) Expression of major vasoconstrictive GPCRs including *Adra1a*, *Adra1b*, *Adra1d*, *Tbx2r*, *Htr2a*, *Ednra*, *Agtr1a*, and *Agtr2* in control and smTKO aortas. (B) Expression of *Ryr2*, *Ryr3*, *Cav1.2*, *Stim1*, *Stim2*, and *Plcb1* were not significantly changed in smTKO vessels compared with control. n=3-6 (with vessels from 3 mice pooled as one sample) per group, Significance was determined by 2-tailed, unpaired Student's *t* test. Data represent mean  $\pm$  SEM (error bars). \**P* < 0.05 versus control.

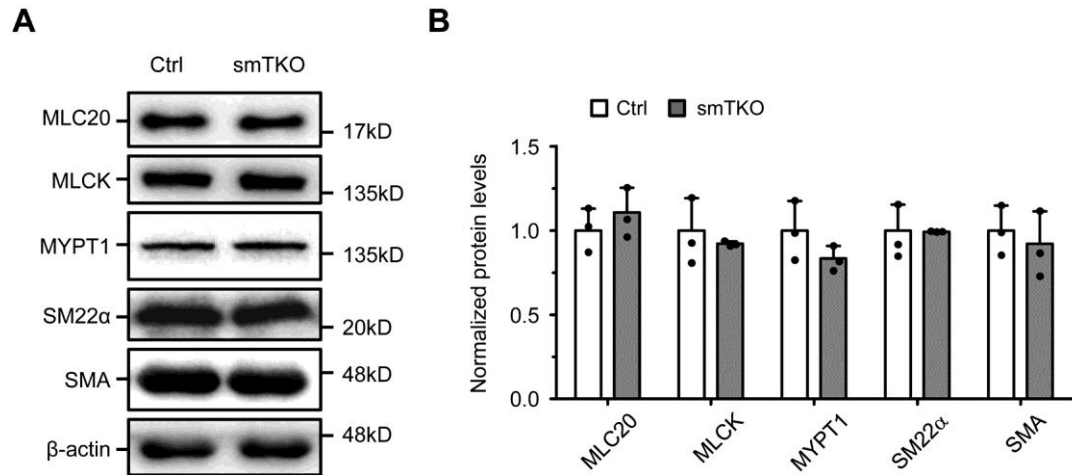

**Supplementary Figure 7. Expression of contractile proteins in control and smTKO vessels.** The expression of myosin light chain20 (MLC20), myosin light chain kinase (MLCK), myosin-binding regulatory subunit (MYPT1), smooth muscle 22α (SM22α), and α-smooth muscle actin (SMA) were accessed by western blot (A), and normalized to β-actin. There is no significant difference in any of these proteins observed between control and smTKO mice (B). n=3 (with vessels from 2 mice pooled as one sample) per group. Significance was determined by 2-tailed, unpaired Student's *t* test. Data represent mean ± SEM (error bars).
